# Supplementary material
Source: Springer Nature journal article supplement (https://www.springermedizin.de/resource/supplementary/12889_2008_1317_MOESM1_ESM.pdf/9502938)

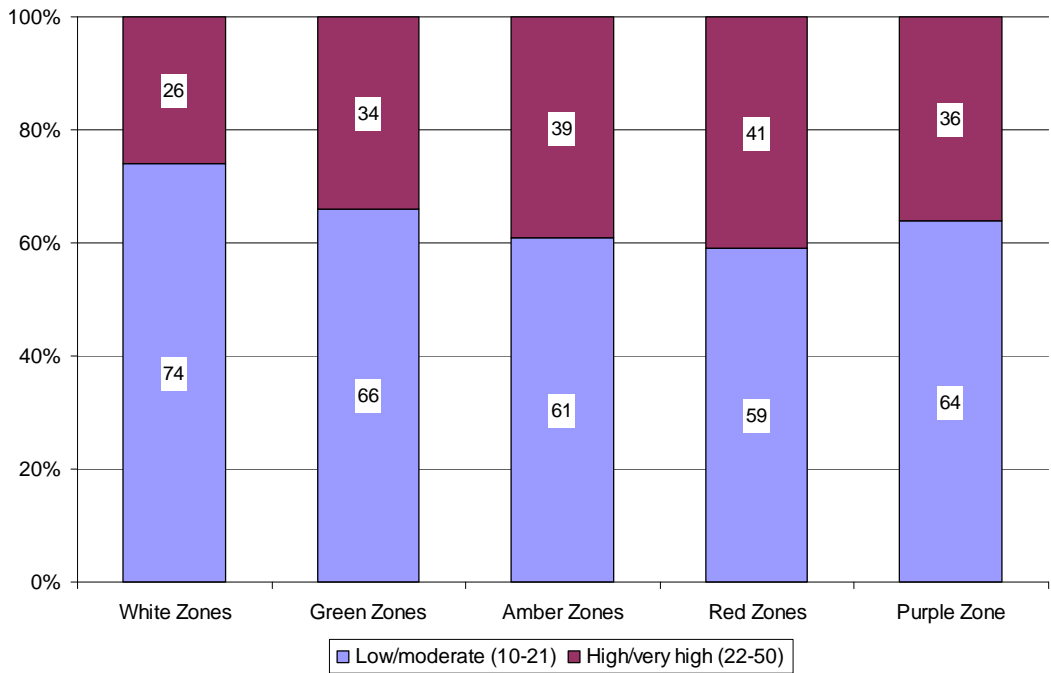

Supplement: MOESM1 [file 9502938]
